# Supplementary material for: Melatonin or Ramelteon for Delirium Prevention in the Intensive Care Unit: A Systematic Review and Meta-Analysis of Randomized Controlled Trials
Source: J Clin Med. 2023 Jan 5;12(2):435. doi: 10.3390/jcm12020435 (PMC9863078; doi:10.3390/jcm12020435)
Supplement: Supplementary file 1 [file jcm-12-00435-s001.zip › jcm-2057125-supplementary.pdf]

# Melatonin or Ramelteon for Delirium Prevention in the Intensive Care Unit: a Systematic Review and Meta-Analysis of Randomized Controlled Trials

## Supplementary

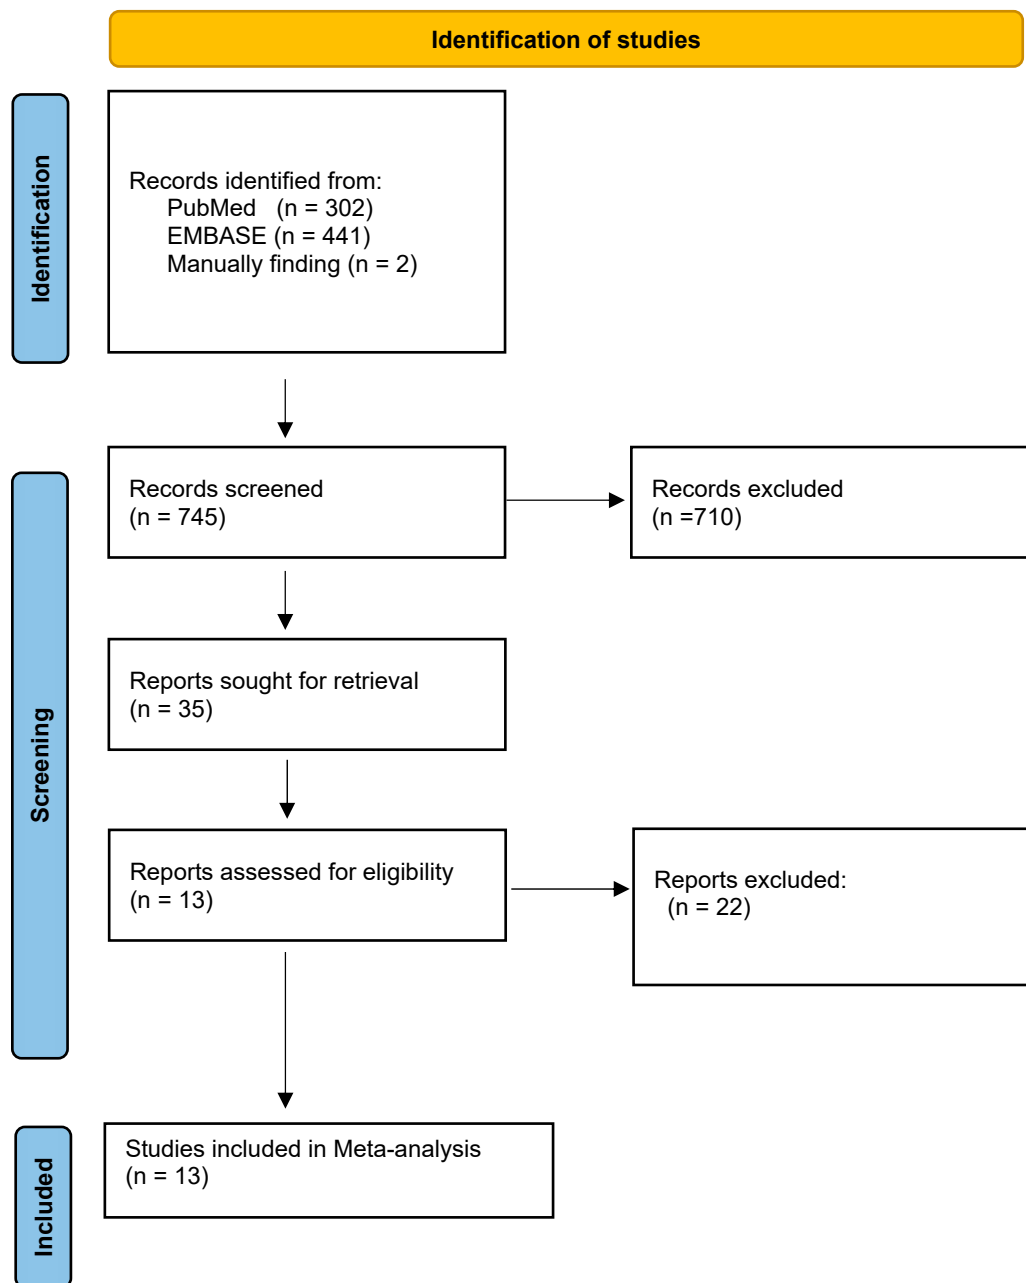

**Figure S1.** PRISMA flowchart graphically describes the process of screening, selection and inclusion of articles.

Abbreviation. PRISMA: Preferred Reporting Items for Systematic reviews and Meta-Analyses

| PICOS        |                                                                                                                                       |
|--------------|---------------------------------------------------------------------------------------------------------------------------------------|
| Participants | Critically ill patients admitted to ICU.                                                                                              |
| Intervention | Melatonin and/or its agonist (Ramelteon), at any dosage.                                                                              |
| Comparison   | Placebo or no other treatment.                                                                                                        |
| Outcomes     | Primary: incidence of Delirium.<br>Secondary: days of mechanical ventilation, length of stay in ICU, mortality.                       |
| Study design | Randomized controlled trials (primary analysis).<br>Non randomized prospective and retrospective studies (sensitivity analysis only). |

**Table S1.** PICOS approach for selecting clinical studies in the systematic search and meta-analysis.  
Abbreviation ICU: intensive care unit; PICOS: population, intervention, comparison, outcome, study design

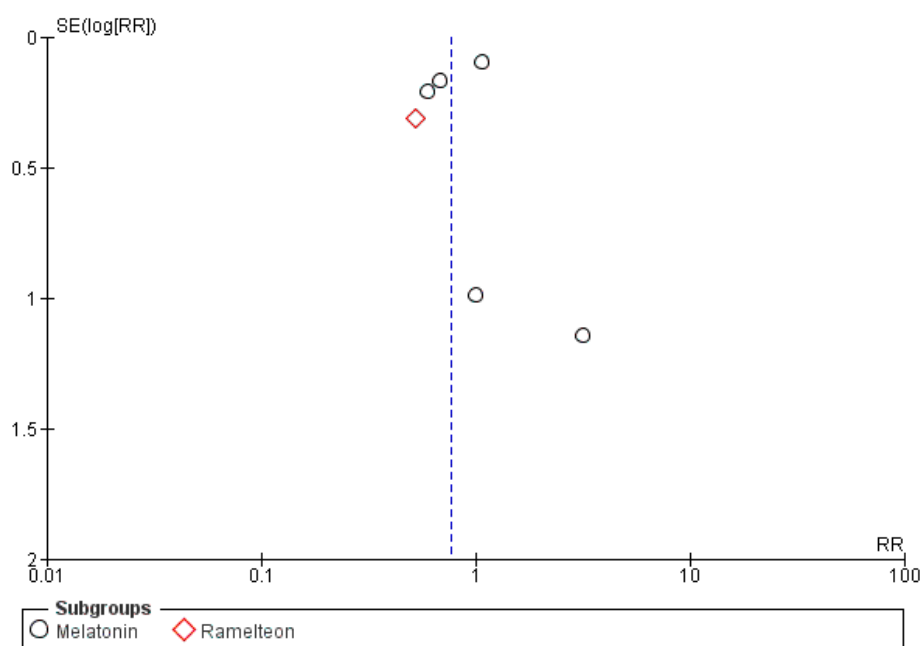

**Figure S2.** Funnel plot of primary outcome – delirium incidence – in primary analysis to evaluate the existence of publication bias.

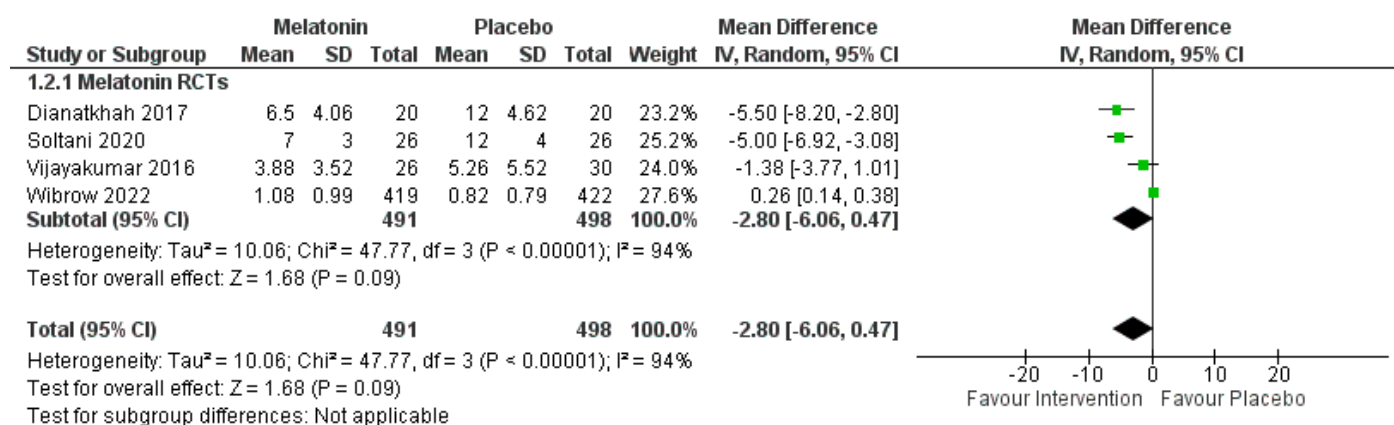

**Figure S3.** Forest plot of secondary outcome reporting the differences of days of MV in patients admitted in the intensive care unit and treated with Melatonin or Ramelteon as compared to Placebo. Abbreviation. CI: confidence interval; M-H: Mantel-Haenszel; MV: mechanical ventilation

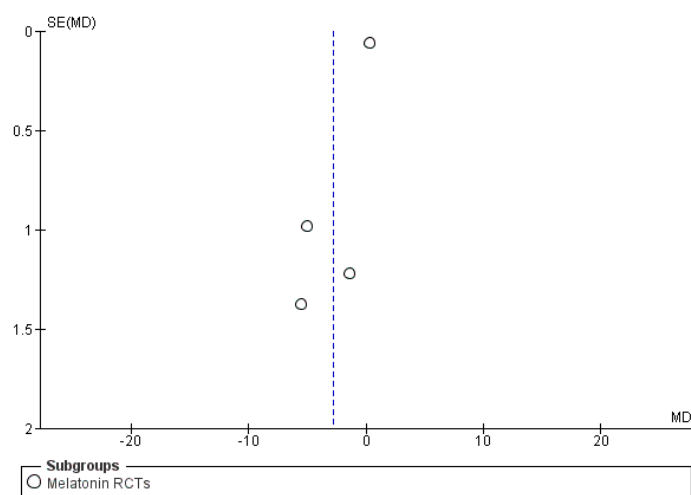

**Figure S4.** Funnel plot of secondary outcome – days of MV – in primary analysis to evaluate the existence of publication bias. Abbreviation. MV: mechanical ventilation.

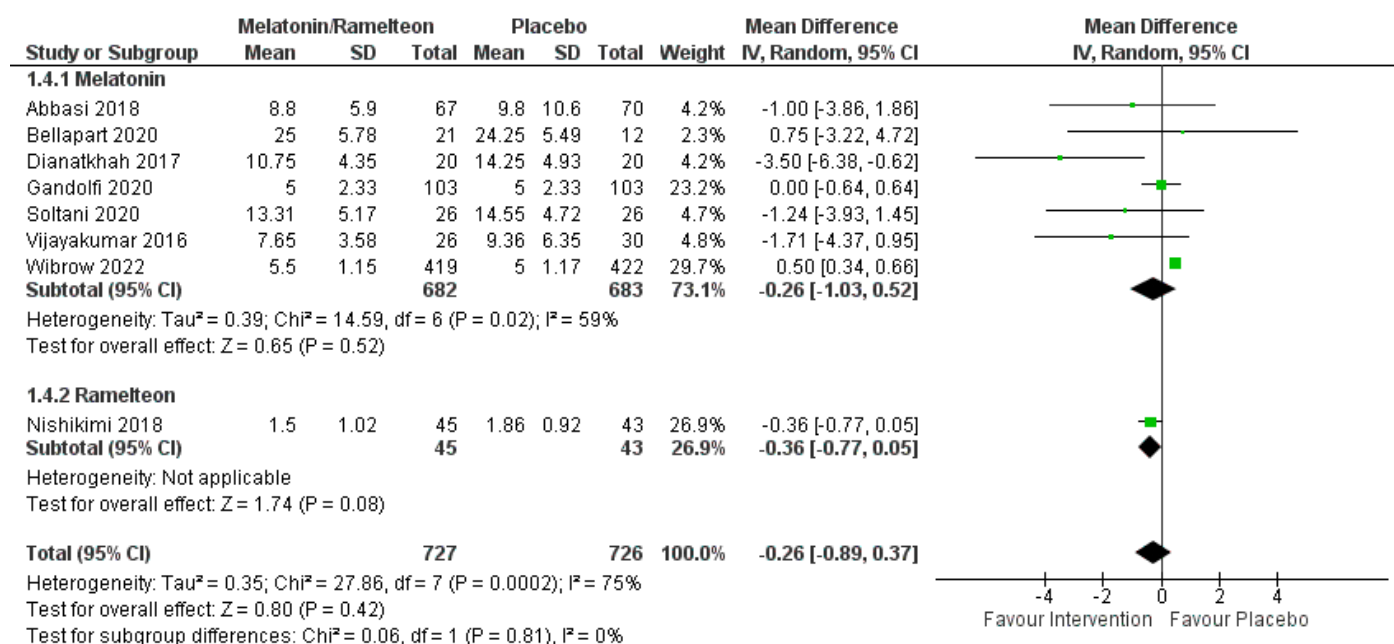

**Figure S5.** Forest plot of secondary outcome reporting the differences of length of stay in patients admitted in the intensive care unit and treated with Melatonin or Ramelteon as compared to Placebo. Abbreviation. CI: confidence interval; M-H: Mantel-Haenszel.

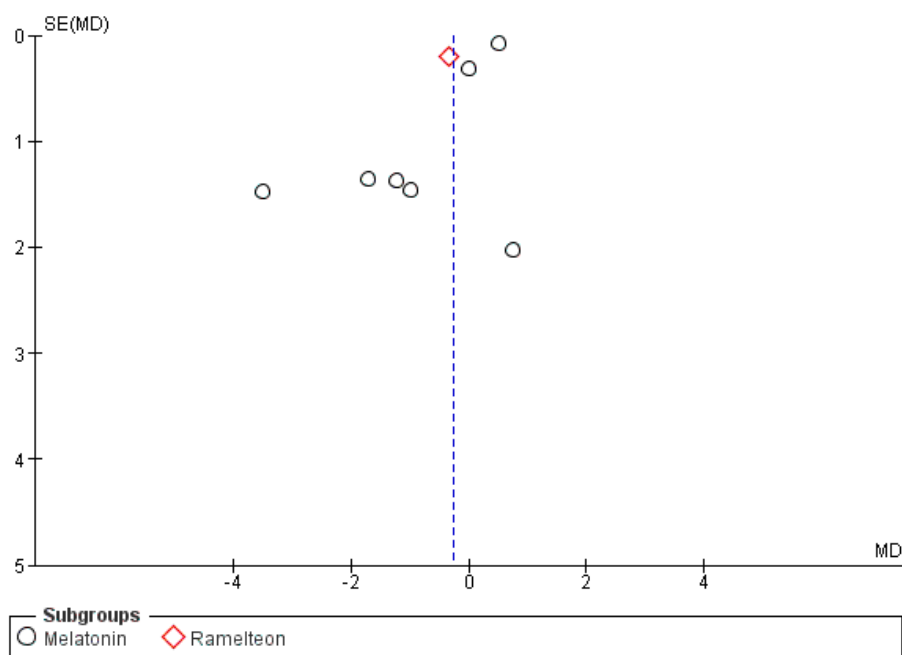

**Figure S6.** Funnel plot of secondary outcome –length of stay– in primary analysis to evaluate the existence of publication bias.

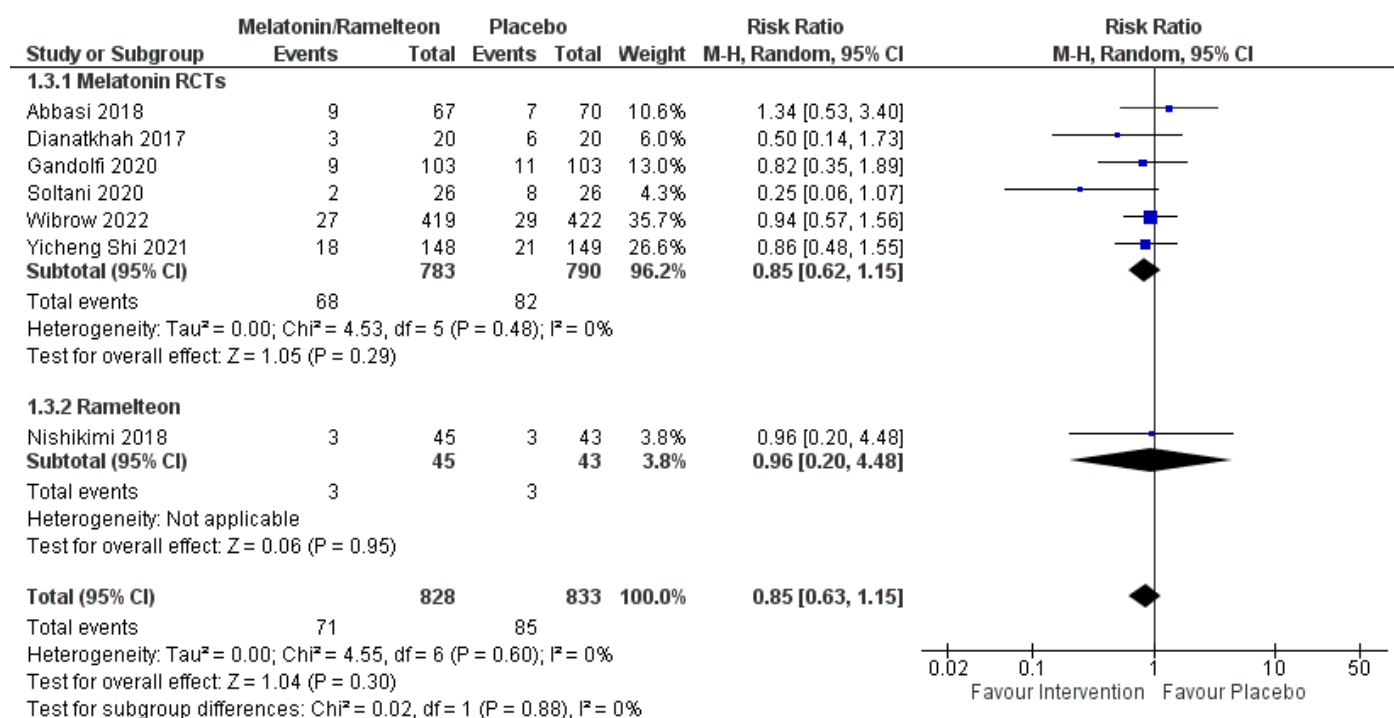

**Figure S7.** Forest plot of secondary outcome reporting the differences of mortality in patients admitted in the intensive care unit and treated with Melatonin or Ramelteon as compared to Placebo. Abbreviation. CI: confidence interval; M-H: Mantel-Haenszel.

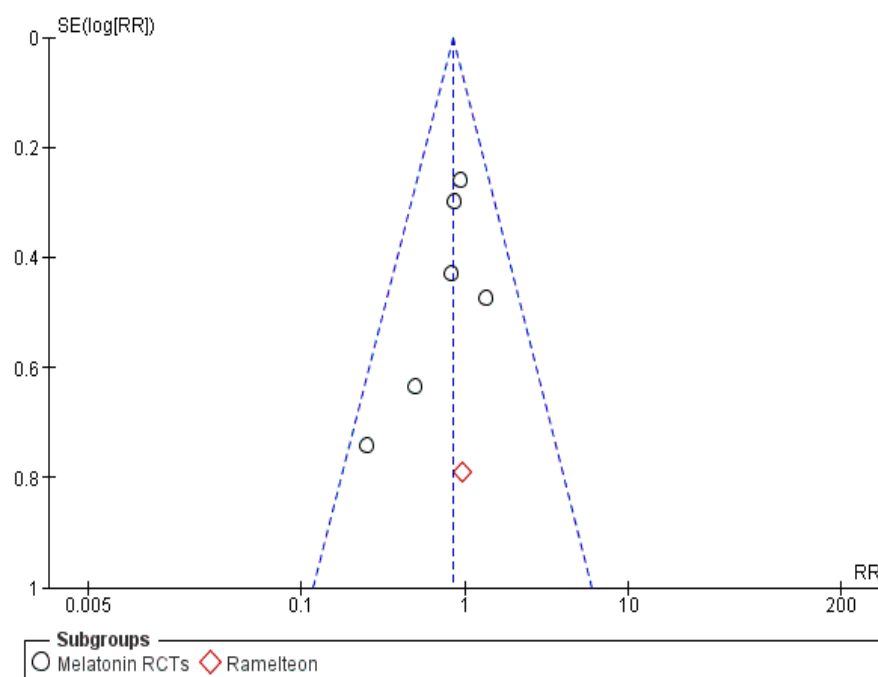

**Figure S8.** Funnel plot of secondary outcome – mortality – to evaluate the existence of publication bias.

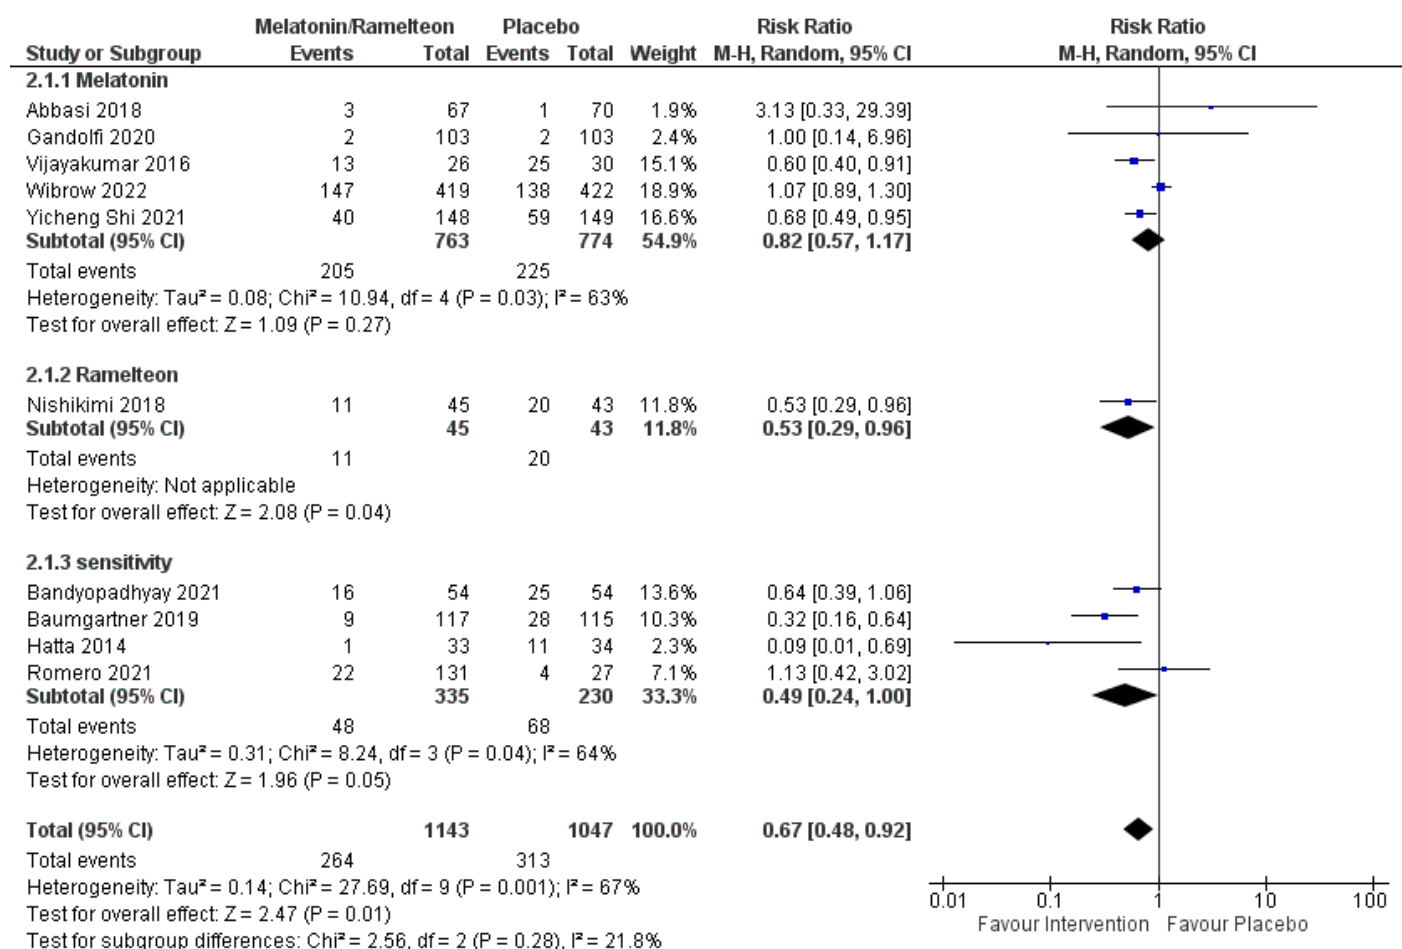

**Figure S9.** Forest plot of primary outcome in sensitivity analysis reporting the differences of delirium incidence in patients admitted in the intensive care unit and treated with Melatonin or Ramelteon as compared to Placebo. Abbreviation. CI: confidence interval; M-H: Mantel-Haenszel.

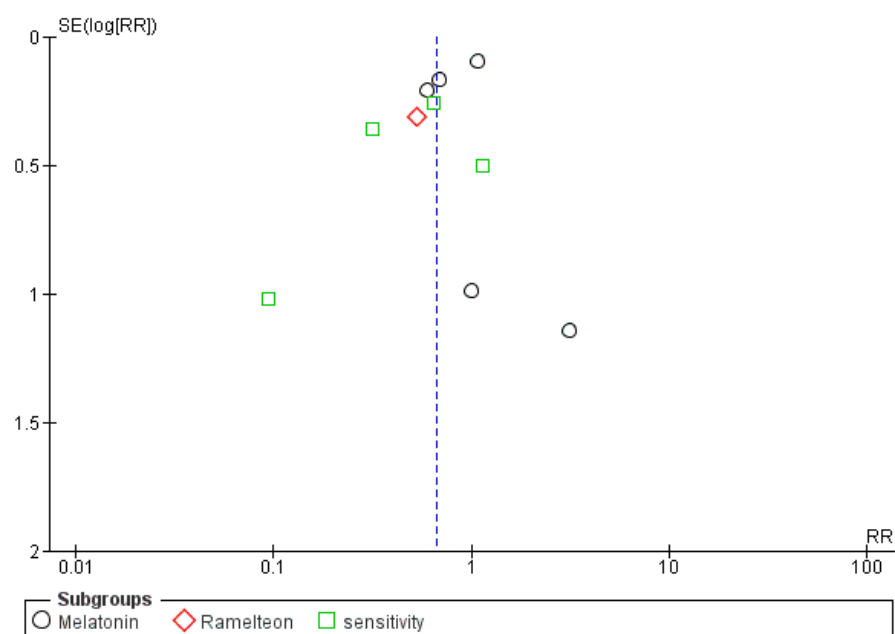

**Figure S10.** Funnel plot of primary outcome – delirium incidence – in sensitivity analysis to evaluate the existence of publication bias.

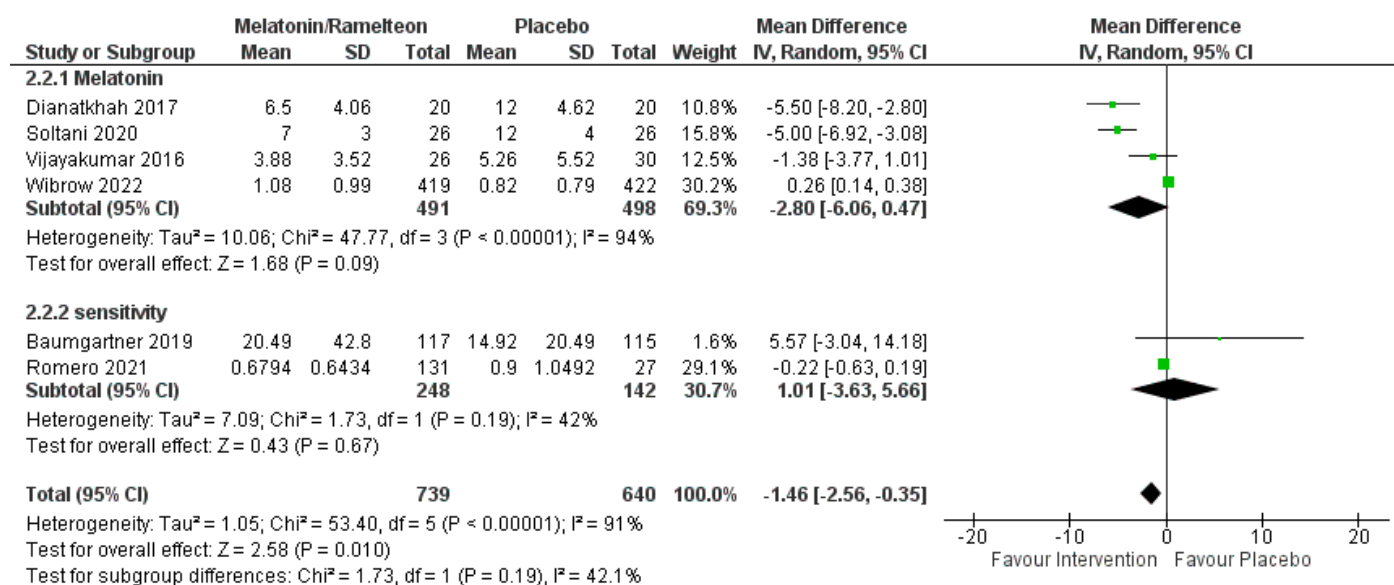

**Figure S11.** Forest plot of secondary outcome in sensitivity analysis reporting the differences of days of MV in patients admitted in the intensive care unit and treated with Melatonin or Ramelteon as compared to Placebo. Abbreviation. CI: confidence interval; M-H: Mantel-Haenszel; MV: mechanical ventilation.

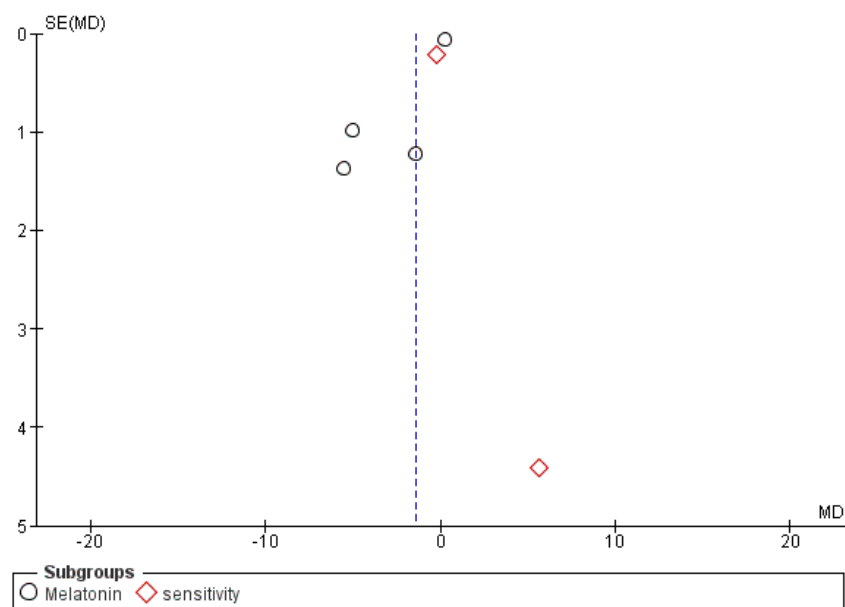

**Figure S12.** Funnel plot of secondary outcome – days of MV – in sensitivity analysis to evaluate the existence of publication bias. Abbreviation. MV: mechanical ventilation.

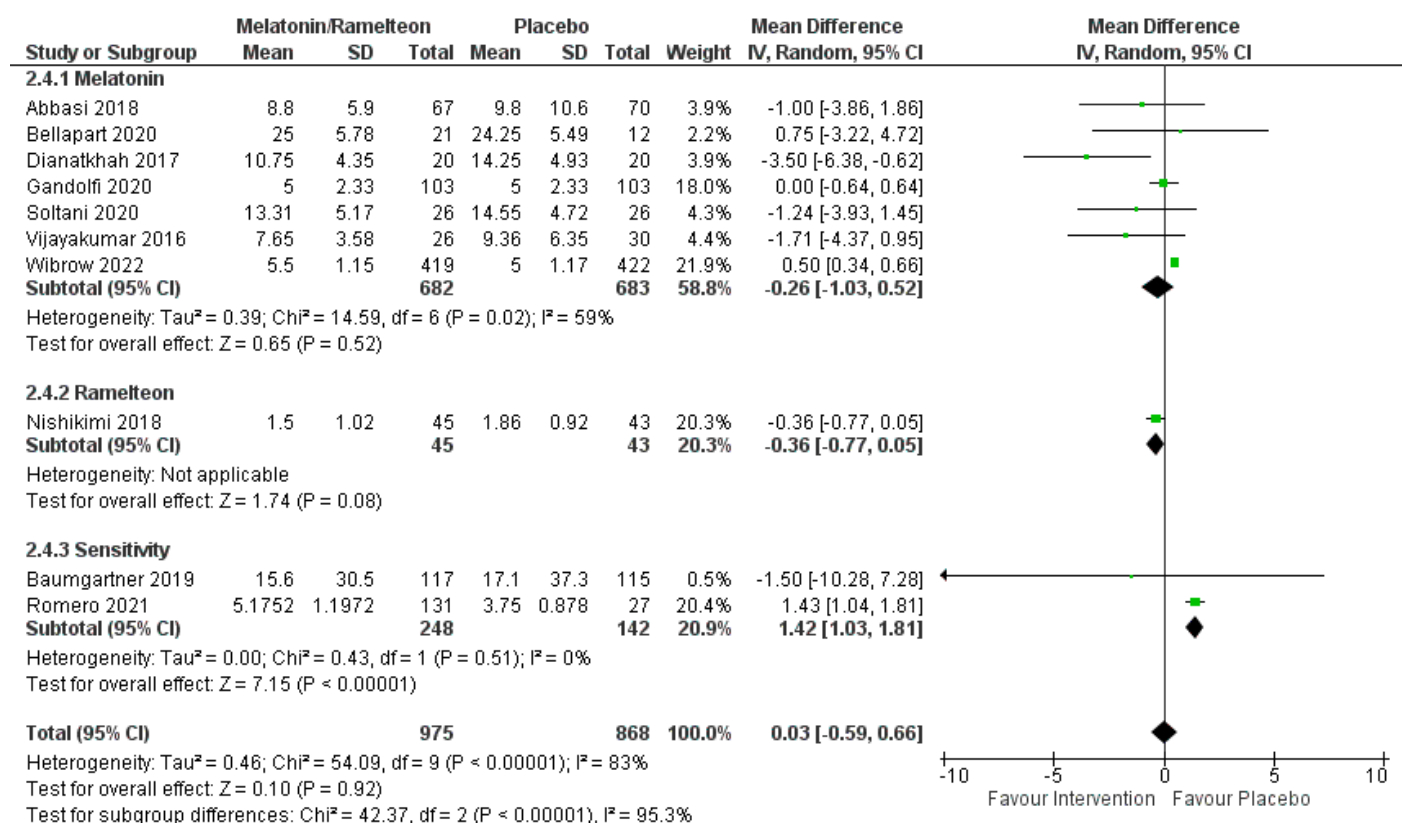

**Figure S13.** Forest plot of secondary outcome in sensitivity analysis reporting the differences of length of stay in patients admitted in the intensive care unit and treated with Melatonin or Ramelteon as compared to Placebo.

Abbreviation. CI: confidence interval; M-H: Mantel-Haenszel.

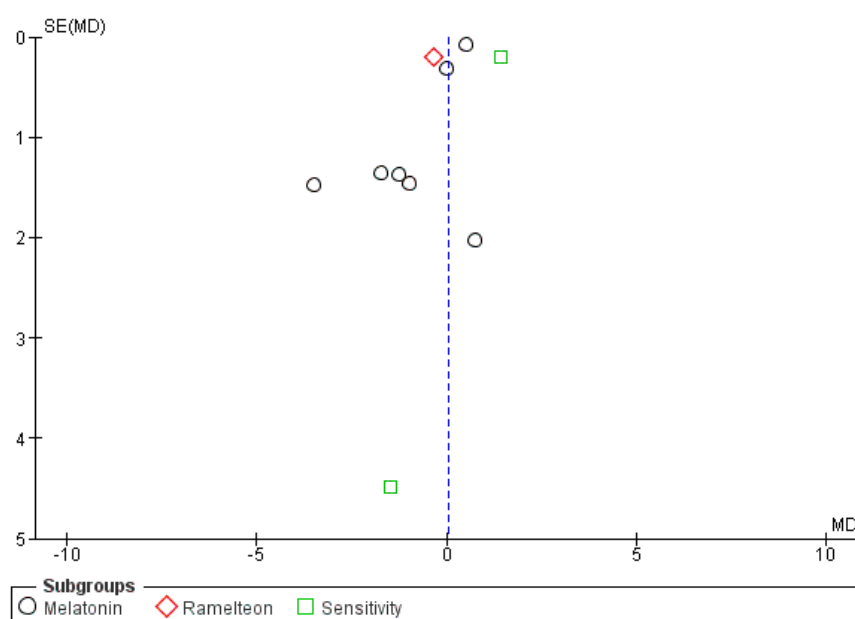

**Figure S14.** Funnel plot of secondary outcome – length of stay – in sensitivity analysis to evaluate the existence of publication bias.

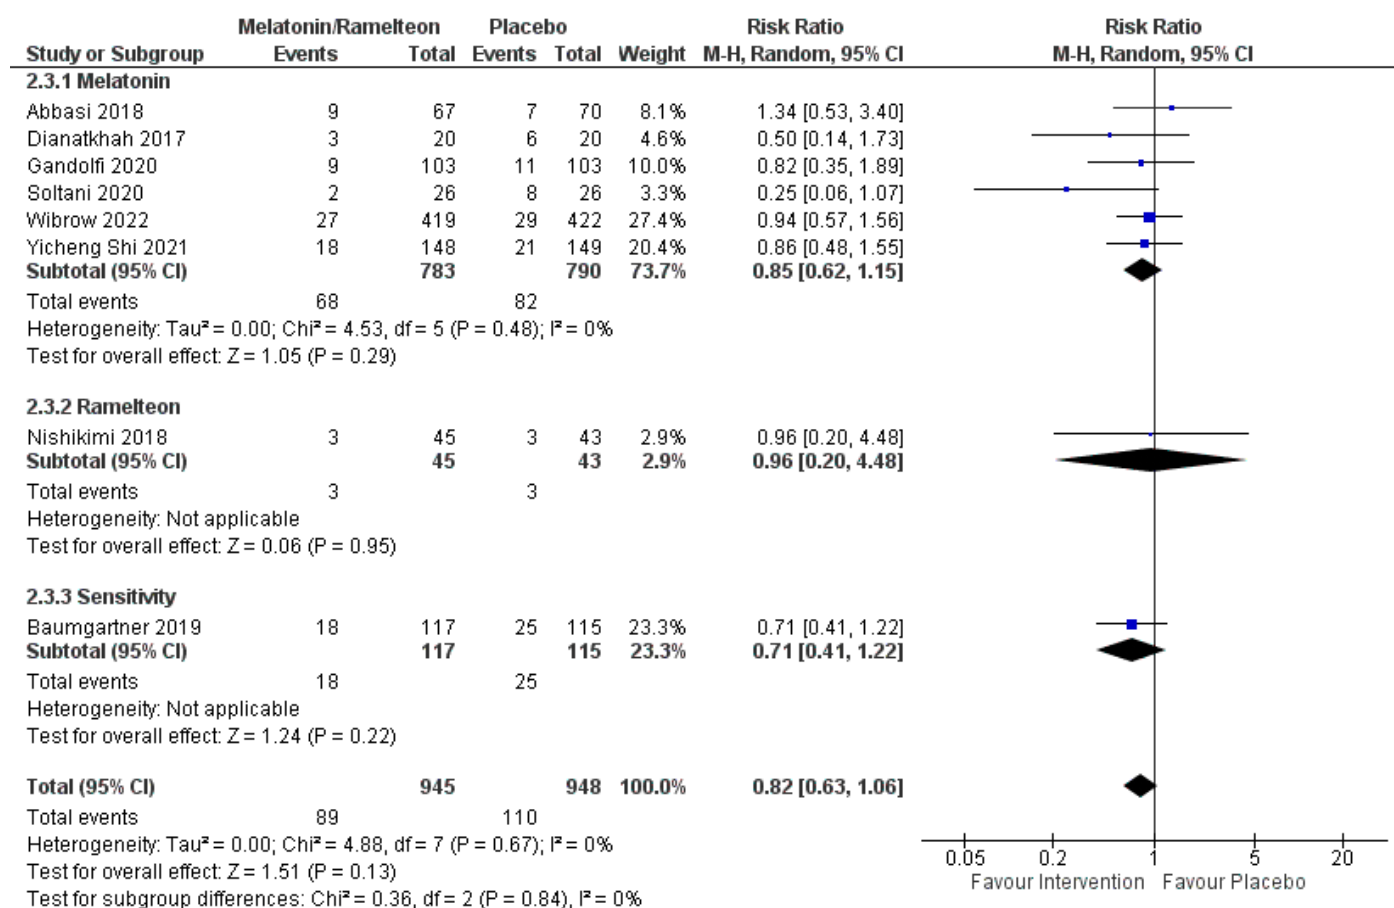

**Figure S15.** Forest plot of secondary outcome in sensitivity analysis reporting the differences of mortality in patients admitted in the intensive care unit and treated with Melatonin or Ramelteon as compared to Placebo. Abbreviation. CI: confidence interval; M-H: Mantel-Haenszel.

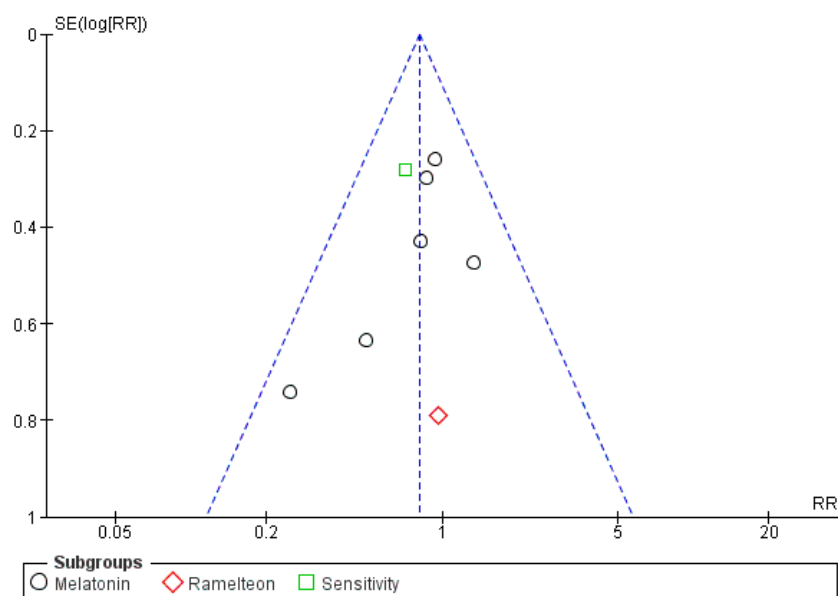

**Figure S16.** Funnel plot of secondary outcome – mortality – in sensitivity analysis to evaluate the existence of publication bias.

## Risk of bias

| Study ID         | Experimental | Comparator | primary Outcome                                              | Weight | D1          | D2          | D3          | D4          | D5          | Overall     |                                               |
|------------------|--------------|------------|--------------------------------------------------------------|--------|-------------|-------------|-------------|-------------|-------------|-------------|-----------------------------------------------|
| Abbasi 2018      | Melatonin    | Placebo    | Delirium incidence                                           | 1      | <div></div> Low risk                          |
| Bellapart 2020   | Melatonin    | Placebo    | Incidence of delirium in ICU                                 | 1      | <div></div> Some concerns                     |
| Dianatkhhah 2017 | Melatonin    | Placebo    | Duration on mechanical ventilation and length of stay in ICU | 1      | <div></div> High risk                         |
| Gandolfi 2020    | Melatonin    | Placebo    | Delirium prevalence                                          | 1      | <div></div> | <div></div> | <div></div> | <div></div> | <div></div> | <div></div> |                                               |
| Nishikimi 2018   | Ramelteon    | Placebo    | Length of stay in ICU                                        | 1      | <div></div> | <div></div> | <div></div> | <div></div> | <div></div> | <div></div> | D2 Deviations from the intended interventions |
| Soltani 2020     | Melatonin    | Placebo    | Mechanical ventilation - Length of stay in ICU               | 1      | <div></div> | <div></div> | <div></div> | <div></div> | <div></div> | <div></div> | D3 Missing outcome data                       |
| Vijayakumar 2016 | Melatonin    | Placebo    | Duration of delirium in ICU                                  | 1      | <div></div> | <div></div> | <div></div> | <div></div> | <div></div> | <div></div> | D4 Measurement of the outcome                 |
| Wibrow 2022      | Melatonin    | Placebo    | Delirium prevalence                                          | 1      | <div></div> | <div></div> | <div></div> | <div></div> | <div></div> | <div></div> | D5 Selection of the reported result           |
| Yicheng Shi 2021 | Melatonin    | Placebo    | Delirium incidence after PCI                                 | 1      | <div></div> | <div></div> | <div></div> | <div></div> | <div></div> | <div></div> |                                               |

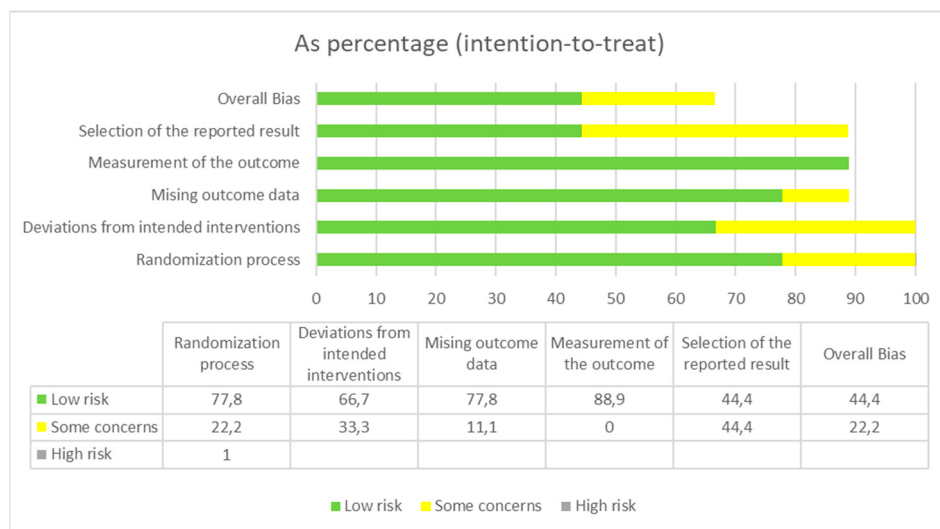

**Table S2.** Risk of bias of RCTs evaluated in primary analysis. Abbreviation. RCT: randomized clinical trial.

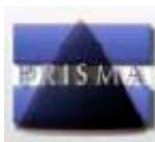

# Melatonin or Ramelteon for delirium prevention in the intensive care unit: a systematic review and meta-analysis of randomized controlled trials.

## PRISMA 2020 Checklist - Supplemental digital content

| Section and Topic             | Item # | Checklist item                                                                                                                                                                                                                                                                                       | Location where item is reported |
|-------------------------------|--------|------------------------------------------------------------------------------------------------------------------------------------------------------------------------------------------------------------------------------------------------------------------------------------------------------|---------------------------------|
| <b>TITLE</b>                  |        |                                                                                                                                                                                                                                                                                                      |                                 |
| Title                         | 1      | Identify the report as a systematic review.                                                                                                                                                                                                                                                          | Page 1                          |
| <b>ABSTRACT</b>               |        |                                                                                                                                                                                                                                                                                                      |                                 |
| Abstract                      | 2      | See the PRISMA 2020 for Abstracts checklist.                                                                                                                                                                                                                                                         | Page 2                          |
| <b>INTRODUCTION</b>           |        |                                                                                                                                                                                                                                                                                                      |                                 |
| Rationale                     | 3      | Describe the rationale for the review in the context of existing knowledge.                                                                                                                                                                                                                          | Page 3-4                        |
| Objectives                    | 4      | Provide an explicit statement of the objective(s) or question(s) the review addresses.                                                                                                                                                                                                               | Page 4-5                        |
| <b>METHODS</b>                |        |                                                                                                                                                                                                                                                                                                      |                                 |
| Eligibility criteria          | 5      | Specify the inclusion and exclusion criteria for the review and how studies were grouped for the syntheses.                                                                                                                                                                                          | Page 4-5                        |
| Information sources           | 6      | Specify all databases, registers, websites, organisations, reference lists and other sources searched or consulted to identify studies. Specify the date when each source was last searched or consulted.                                                                                            | Page 5                          |
| Search strategy               | 7      | Present the full search strategies for all databases, registers and websites, including any filters and limits used.                                                                                                                                                                                 | Page 5                          |
| Selection process             | 8      | Specify the methods used to decide whether a study met the inclusion criteria of the review, including how many reviewers screened each record and each report retrieved, whether they worked independently, and if applicable, details of automation tools used in the process.                     | Page 5                          |
| Data collection process       | 9      | Specify the methods used to collect data from reports, including how many reviewers collected data from each report, whether they worked independently, any processes for obtaining or confirming data from study investigators, and if applicable, details of automation tools used in the process. | Page 5                          |
| Data items                    | 10a    | List and define all outcomes for which data were sought. Specify whether all results that were compatible with each outcome domain in each study were sought (e.g. for all measures, time points, analyses), and if not, the methods used to decide which results to collect.                        |                                 |
|                               | 10b    | List and define all other variables for which data were sought (e.g. participant and intervention characteristics, funding sources). Describe any assumptions made about any missing or unclear information.                                                                                         |                                 |
| Study risk of bias assessment | 11     | Specify the methods used to assess risk of bias in the included studies, including details of the tool(s) used, how many reviewers assessed each study and whether they worked independently, and if applicable, details of automation tools used in the process.                                    | Page 5                          |
| Effect measures               | 12     | Specify for each outcome the effect measure(s) (e.g. risk ratio, mean difference) used in the synthesis or presentation of results.                                                                                                                                                                  | Page 8-9                        |

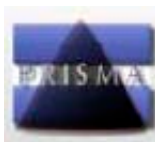

# Melatonin or Ramelteon for delirium prevention in the intensive care unit: a systematic review and meta-analysis of randomized controlled trials.

## PRISMA 2020 Checklist - Supplemental digital content

| Section and Topic             | Item # | Checklist item                                                                                                                                                                                                                                              | Location where item is reported  |
|-------------------------------|--------|-------------------------------------------------------------------------------------------------------------------------------------------------------------------------------------------------------------------------------------------------------------|----------------------------------|
| Synthesis methods             | 13a    | Describe the processes used to decide which studies were eligible for each synthesis (e.g. tabulating the study intervention characteristics and comparing against the planned groups for each synthesis (item #5)).                                        |                                  |
|                               | 13b    | Describe any methods required to prepare the data for presentation or synthesis, such as handling of missing summary statistics, or data conversions.                                                                                                       |                                  |
|                               | 13c    | Describe any methods used to tabulate or visually display results of individual studies and syntheses.                                                                                                                                                      |                                  |
|                               | 13d    | Describe any methods used to synthesize results and provide a rationale for the choice(s). If meta-analysis was performed, describe the model(s), method(s) to identify the presence and extent of statistical heterogeneity, and software package(s) used. |                                  |
|                               | 13e    | Describe any methods used to explore possible causes of heterogeneity among study results (e.g. subgroup analysis, meta-regression).                                                                                                                        |                                  |
|                               | 13f    | Describe any sensitivity analyses conducted to assess robustness of the synthesized results.                                                                                                                                                                | Page 8-9                         |
| Reporting bias assessment     | 14     | Describe any methods used to assess risk of bias due to missing results in a synthesis (arising from reporting biases).                                                                                                                                     | Supplementary materials          |
| Certainty assessment          | 15     | Describe any methods used to assess certainty (or confidence) in the body of evidence for an outcome.                                                                                                                                                       | Page 6 –Figure 2                 |
| <b>RESULTS</b>                |        |                                                                                                                                                                                                                                                             |                                  |
| Study selection               | 16a    | Describe the results of the search and selection process, from the number of records identified in the search to the number of studies included in the review, ideally using a flow diagram.                                                                | Page 6 – supplementary materials |
|                               | 16b    | Cite studies that might appear to meet the inclusion criteria, but which were excluded, and explain why they were excluded.                                                                                                                                 |                                  |
| Study characteristics         | 17     | Cite each included study and present its characteristics.                                                                                                                                                                                                   | Table 1                          |
| Risk of bias in studies       | 18     | Present assessments of risk of bias for each included study.                                                                                                                                                                                                | Supplementary materials          |
| Results of individual studies | 19     | For all outcomes, present, for each study: (a) summary statistics for each group (where appropriate) and (b) an effect estimate and its precision (e.g. confidence/credible interval), ideally using structured tables or plots.                            |                                  |



# Melatonin or Ramelteon for delirium prevention in the intensive care unit: a systematic review and meta-analysis of randomized controlled trials.

## PRISMA 2020 Checklist - Supplemental digital content

| Section and Topic                              | Item # | Checklist item                                                                                                                                                                                                                                                                       | Location where item is reported |
|------------------------------------------------|--------|--------------------------------------------------------------------------------------------------------------------------------------------------------------------------------------------------------------------------------------------------------------------------------------|---------------------------------|
| Results of syntheses                           | 20a    | For each synthesis, briefly summarise the characteristics and risk of bias among contributing studies.                                                                                                                                                                               |                                 |
|                                                | 20b    | Present results of all statistical syntheses conducted. If meta-analysis was done, present for each the summary estimate and its precision (e.g. confidence/credible interval) and measures of statistical heterogeneity. If comparing groups, describe the direction of the effect. | Table 2                         |
|                                                | 20c    | Present results of all investigations of possible causes of heterogeneity among study results.                                                                                                                                                                                       |                                 |
|                                                | 20d    | Present results of all sensitivity analyses conducted to assess the robustness of the synthesized results.                                                                                                                                                                           |                                 |
| Reporting biases                               | 21     | Present assessments of risk of bias due to missing results (arising from reporting biases) for each synthesis assessed.                                                                                                                                                              |                                 |
| Certainty of evidence                          | 22     | Present assessments of certainty (or confidence) in the body of evidence for each outcome assessed.                                                                                                                                                                                  |                                 |
| <b>DISCUSSION</b>                              |        |                                                                                                                                                                                                                                                                                      |                                 |
| Discussion                                     | 23a    | Provide a general interpretation of the results in the context of other evidence.                                                                                                                                                                                                    | Page 12-13-14                   |
|                                                | 23b    | Discuss any limitations of the evidence included in the review.                                                                                                                                                                                                                      | Page 14-15                      |
|                                                | 23c    | Discuss any limitations of the review processes used.                                                                                                                                                                                                                                |                                 |
|                                                | 23d    | Discuss implications of the results for practice, policy, and future research.                                                                                                                                                                                                       | Page 15                         |
| <b>OTHER INFORMATION</b>                       |        |                                                                                                                                                                                                                                                                                      |                                 |
| Registration and protocol                      | 24a    | Provide registration information for the review, including register name and registration number, or state that the review was not registered.                                                                                                                                       | Page 4                          |
|                                                | 24b    | Indicate where the review protocol can be accessed, or state that a protocol was not prepared.                                                                                                                                                                                       | Page 4                          |
|                                                | 24c    | Describe and explain any amendments to information provided at registration or in the protocol.                                                                                                                                                                                      |                                 |
| Support                                        | 25     | Describe sources of financial or non-financial support for the review, and the role of the funders or sponsors in the review.                                                                                                                                                        |                                 |
| Competing interests                            | 26     | Declare any competing interests of review authors.                                                                                                                                                                                                                                   |                                 |
| Availability of data, code and other materials | 27     | Report which of the following are publicly available and where they can be found: template data collection forms; data extracted from included studies; data used for all analyses; analytic code; any other materials used in the review.                                           |                                 |

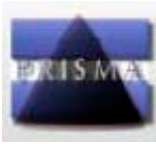

# **Melatonin or Ramelteon for delirium prevention in the intensive care unit: a systematic review and meta-analysis of randomized controlled trials.**

## **PRISMA 2020 Checklist - Supplemental digital content**

*From:* Page MJ, McKenzie JE, Bossuyt PM, Boutron I, Hoffmann TC, Mulrow CD, et al. The PRISMA 2020 statement: an updated guideline for reporting systematic reviews. *BMJ* 2021;372:n71. doi: 10.1136/bmj.n71

For more information, visit: <http://www.prisma-statement.org/>
